# Supplementary material
Source: PubMed Central journal article supplement (PMC5850938)

Supplementary Figure. Original western blot images

Fig. 1c

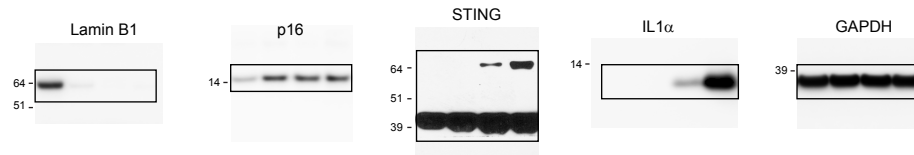

Fig. 2a

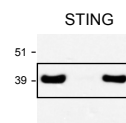

Fig. 2c (Left)

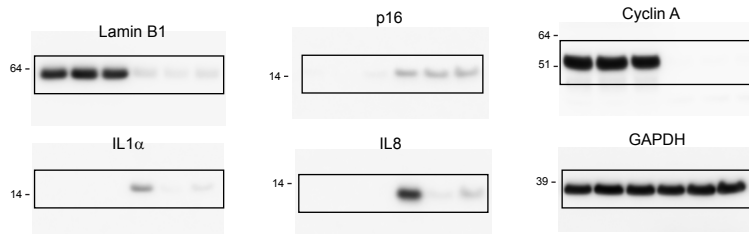

Fig. 2c (Right)

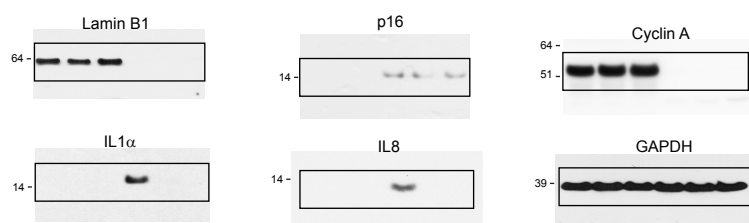

Fig. 4e

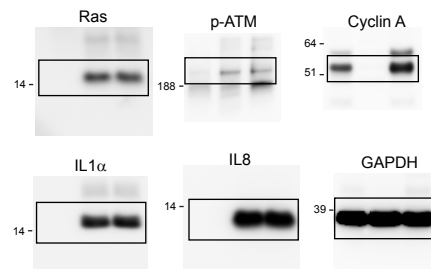

Fig. 2g

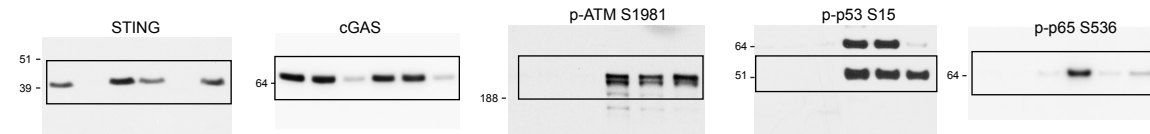

Fig. 4f

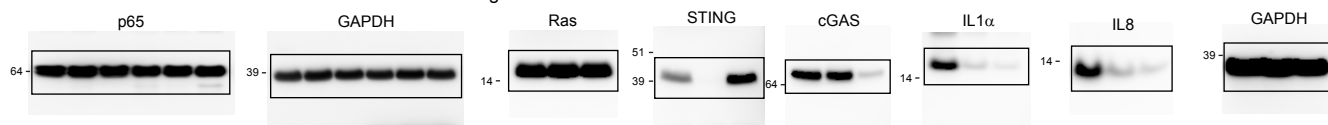

Extended Data Fig. 1h

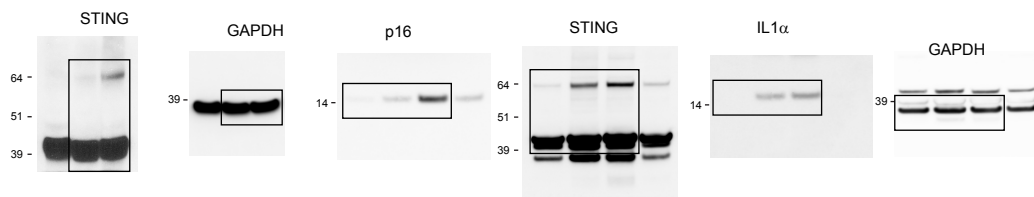

Extended Data Fig. 3d

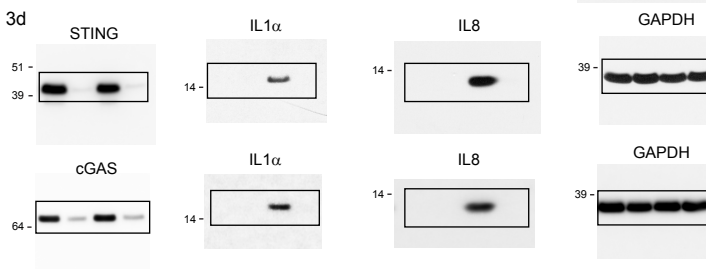

Extended Data Fig. 3g

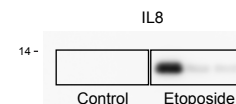

Extended Data Fig. 4f

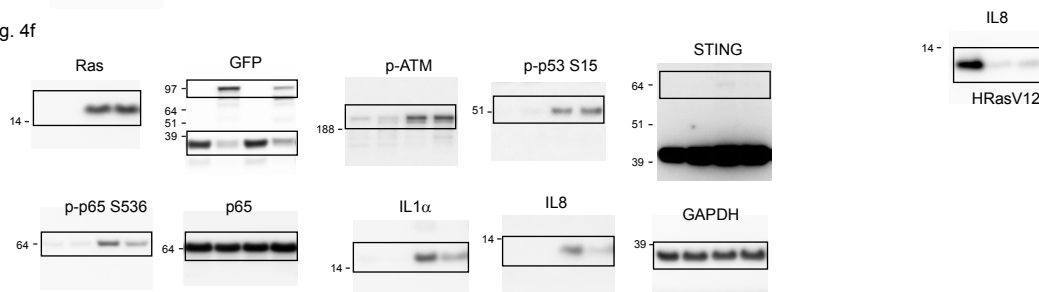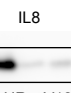

Supplement: NIHMS904065-supplement-1.pdf [file NIHMS904065-supplement-1.pdf]
